# Supplementary material for: Alcohol outlets and alcohol consumption in changing environments: prevalence and changes over time
Source: PubMed Central journal article supplement (PMC8815126; doi:10.1186/s13011-021-00430-6), 2022-02-04
Supplement: 13011_2021_430_MOESM1_ESM.pdf [file 13011_2021_430_MOESM1_ESM.pdf]

# Supplement File

**Title:** Alcohol outlets and alcohol consumption in changing environments: prevalence and changes over time

**Authors:** Amy H. Auchincloss\*, Saima Niamatullah, Maura Adams, Steven Melly, Jingjing Li, Mariana Lazo

\* Correspondence to: E-mail: aha27@drexel.edu

## List of supplementary Figures and Tables

|                                                                                                                                                                                                                                                                                                                 |   |
|-----------------------------------------------------------------------------------------------------------------------------------------------------------------------------------------------------------------------------------------------------------------------------------------------------------------|---|
| <b>Supplement to main text description of the analytical sample</b> .....                                                                                                                                                                                                                                       | 2 |
| <b>Supplement Figure 1.</b> Enrollment and retention .....                                                                                                                                                                                                                                                      | 2 |
| <b>Supplement Table 1.</b> Baseline policies related to off-premise sale of alcohol in Pennsylvania and the two comparison states (New Jersey and Delaware) .....                                                                                                                                               | 3 |
| <b>Supplement Table 2</b> Additional details on alcohol consumption measures.....                                                                                                                                                                                                                               | 4 |
| <b>Supplement Table 3.</b> Characteristics of included vs. excluded participants.....                                                                                                                                                                                                                           | 5 |
| <b>Supplement Table 4.</b> Alcohol consumption and alcohol outlets, baseline and the one-year follow-up for total, Pennsylvania and non-Pennsylvania, N=772 .....                                                                                                                                               | 6 |
| <b>Supplement Table 5.</b> Sensitivity analysis - sample subset to drinkers. Adjusted cross-sectional estimates of alcohol consumption with density of off-premise outlets and distance to outlets. N=565 .....                                                                                                 | 7 |
| <b>Supplement Table 6.</b> Sensitivity analysis - sample subset to drinkers. Multinomial regression, adjusted within-person change in alcohol consumption (change in days, drinks, binge occasions) for an increase in off-premise alcohol outlets within a 1.6 km buffer (>0 increase in outlets). N=521 ..... | 8 |
| <b>Supplement Figure 2.</b> Adjusted cross-sectional estimates of exposure to off premise alcohol outlets (density of and distance to outlets) and number of drinks per day, stratified by gender. ....                                                                                                         | 9 |

## Supplement to main text description of the analytical sample

There were 2555 survey participants aged  $\geq 21$  who were asked the alcohol questions at baseline, and 802 of these participants responded to the follow-up survey (31% retention). Losses to follow-up were primarily due to no response after at least 7 call attempts (50%) or refusal at follow-up (hard refusal, requests to be added to do not call list, or other reason). Among the 802 participants who responded to the follow-up survey, 30 participants were excluded due to missing outcome or exposure data, leaving 772 participants in the cross-sectional analyses.

Despite low cohort retention at follow-up, those included vs. lost-to-follow-up were mostly similar (Supplement Table 1) and the analytic sample was comparable to the age, gender, race distribution in the census population in the areas where the cohort resided (U.S. Census Bureau, 2018). The exception was that the lost-to-follow-up sample had more participants with other race, lower income and lower education, and higher proportion of non-drinking. The lost-to-follow-up pattern was similar for Pennsylvania and non-Pennsylvania except that a larger share of non-Whites were lost-to-follow-up in non-Pennsylvania.

Citation: U.S. Census Bureau. (2018). QuickFacts Available online: <https://www.census.gov/quickfacts/fact/table/philadelphiacitypennsylvania,philadelphiacountypennsylvania,philadelphiacitymississippi,US/PST045217>. Last accessed February 1, 2019. Retrieved from Washington, DC:

### Supplement Figure 1. Enrollment and retention

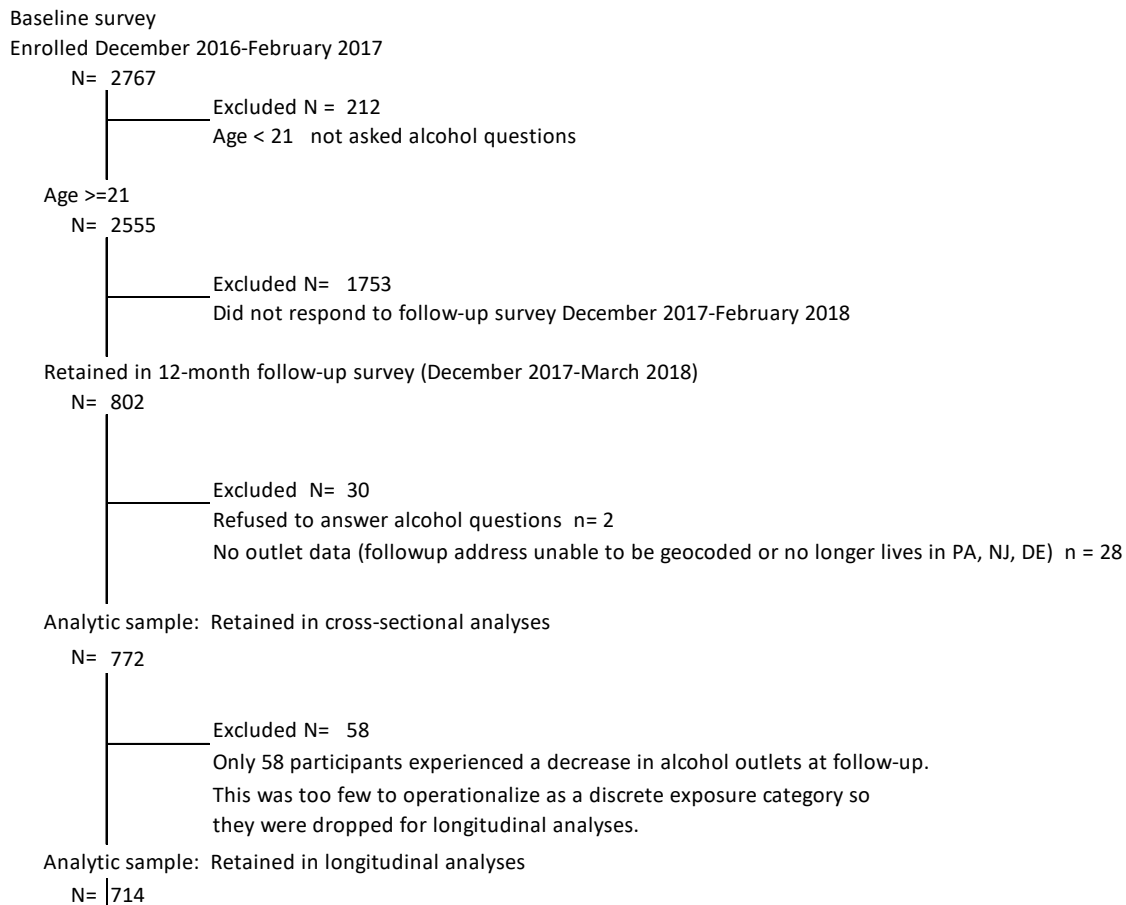

**Supplement Table 1.** Baseline policies related to off-premise sale of alcohol in Pennsylvania and the two comparison states (New Jersey and Delaware)

| State                              | Pennsylvania, original policies (baseline)                                        |                                                                                                                | New Jersey                                                                                                                                  | Delaware                                                                          |
|------------------------------------|-----------------------------------------------------------------------------------|----------------------------------------------------------------------------------------------------------------|---------------------------------------------------------------------------------------------------------------------------------------------|-----------------------------------------------------------------------------------|
|                                    | <b>Liquor and wine</b>                                                            | <b>Beer and wine sellers</b>                                                                                   |                                                                                                                                             |                                                                                   |
| <b>Sales hours</b>                 | <b>Mon to Sat:</b><br>9:00am to 10:00pm<br><br><b>Sunday:</b><br>11:00am - 7:00pm | <b>Mon to Sat:</b><br>9:00am to 10:00pm<br><br><b>Sunday:</b><br>11:00am - 7:00pm                              | <b>Mon to Sat:</b><br>9:00am to 10:00pm<br><br><b>Sunday:</b><br>9:00am to 10:00pm<br>(although some counties<br>have reduced Sunday hours) | <b>Mon to Sat:</b><br>9:00am to 1:00am<br><br><b>Sunday:</b><br>12:00pm to 8:00pm |
| <b>Are there State-run stores?</b> | Yes, State-run stores for liquor and wine                                         |                                                                                                                | No State-run stores                                                                                                                         | No State-run stores                                                               |
| <b>Liquor</b>                      | State-run stores                                                                  |                                                                                                                | Liquor stores, private                                                                                                                      | Liquor stores, private                                                            |
| <b>Wine</b>                        | State-run stores                                                                  |                                                                                                                | Liquor stores, private                                                                                                                      | Liquor stores, private                                                            |
| <b>Beer</b>                        |                                                                                   | Beer stores (AKA 'distributors') were generally only permitted to sell cases beer, 12 or 24 beers in each case | Non-chain retail stores. *                                                                                                                  | Liquor stores, private                                                            |

\* New Jersey (NJ) did not have a ban on selling beer at retail stores. However, NJ limited each company to only two licenses (reference: [stateliquorlaws.com/state/NJ](http://stateliquorlaws.com/state/NJ)).

## Supplement Table 2 Additional details on alcohol consumption measures

### Supplementary text to main text: Outcomes: Alcohol consumption

Participants aged  $\geq 21$  were asked if they consumed any type of alcoholic beverage in the past 30 days. Only past-30 days was asked in order to keep the phone survey focused/brief (and has been used by others (CDC, 2019)). If the participant answered yes' to past 30 day alcohol consumption, then subsequent questions were asked regarding alcohol consumption.

Subsequent questions were asked regarding the number of days alcohol was consumed (“In the past 30 days, how many days per week or per month did you drink any alcoholic beverages?”), and the number of drinks consumed per day (“Thinking about the most recent occasion when you drank any alcoholic beverage, how many drinks did you have?” ). A question was also asked about binge drinking, using the definition from the U.S. Substance Abuse and Mental Health Services Administration (SAMHSA, 2017) as drinking  $\geq 5$  alcoholic drinks for males and  $\geq 4$  for females on a single occasion ( “Many people are able to drink X or more alcoholic beverages on an occasion. In the past 30 days, on how many days do you think you had X or more drinks of any alcoholic beverage on an occasion? An example of an occasion would be one evening.”) Because Pennsylvania’s relaxation of alcohol control primarily increased access to wine and beer, the survey also asked what type of alcohol was consumed in the past 30 days. However, results were not shown by alcohol type because 90% reported consuming both beer and wine and only 10% consumed solely spirits.

#### Citations:

CDC. 2019 BRFSS Questionnaire <https://www.cdc.gov/brfss/questionnaires/pdf-ques/2019-BRFSS-Questionnaire-508.pdf> (Last accessed March 20, 2021). 2019.

SAMHSA. Binge Drinking: Terminology and Patterns of Use, 2016. Available at: <https://www.samhsa.gov/data/report/2017-methodological-summary-and-definitions>. (Last accessed 1/18/17).

**Supplement Table 3.** Characteristics of included vs. excluded participants

|                                             | <b>Participants Included</b> |          | <b>Participants Excluded</b><br>(after remove ineligible [ages 18-<21]) |          |
|---------------------------------------------|------------------------------|----------|-------------------------------------------------------------------------|----------|
|                                             | N                            | Column % | N                                                                       | Column % |
|                                             | 772                          | 100%     | 1783                                                                    | 100%     |
| Age Group                                   |                              |          | 212                                                                     |          |
| 21 to 34                                    | 197                          | 26%      | 545                                                                     | 31%      |
| 35 to 49                                    | 218                          | 28%      | 518                                                                     | 29%      |
| 50 to 64                                    | 357                          | 46%      | 720                                                                     | 40%      |
| Gender                                      |                              |          |                                                                         |          |
| Female                                      | 402                          | 52%      | 949                                                                     | 53%      |
| Male                                        | 370                          | 48%      | 834                                                                     | 47%      |
| Race                                        |                              |          |                                                                         |          |
| Black                                       | 259                          | 34%      | 658                                                                     | 37%      |
| White                                       | 419                          | 54%      | 754                                                                     | 42%      |
| Other                                       | 94                           | 12%      | 371                                                                     | 21%      |
| State                                       |                              |          |                                                                         |          |
| Pennsylvania                                | 442                          | 57%      | 963                                                                     | 55%      |
| Delaware                                    | 151                          | 20%      | 321                                                                     | 18%      |
| New Jersey                                  | 179                          | 23%      | 470                                                                     | 27%      |
| Consumed alcoholic beverage in past 30 days |                              |          |                                                                         |          |
| No                                          | 268                          | 35%      | 726                                                                     | 41%      |
| Yes                                         | 504                          | 65%      | 1049                                                                    | 59%      |
|                                             | Mean                         | STD      | Mean                                                                    | STD      |
| Income per capita                           | \$33200                      | \$22100  | \$31300                                                                 | \$23300  |
| Years of education                          | 14.81                        | 2.34     | 14.04                                                                   | 2.24     |

**Supplement Table 4.** Alcohol consumption and alcohol outlets, at baseline and one-year follow-up for total, Pennsylvania, and non-Pennsylvania, N=772\*

|                                                                                                                                | Baseline |       |              |        |                  |       | Followup time period |       |              |        |                  |       |        |       |       |       |       |       |
|--------------------------------------------------------------------------------------------------------------------------------|----------|-------|--------------|--------|------------------|-------|----------------------|-------|--------------|--------|------------------|-------|--------|-------|-------|-------|-------|-------|
|                                                                                                                                | All      |       | Pennsylvania |        | Non-Pennsylvania |       | All                  |       | Pennsylvania |        | Non-Pennsylvania |       |        |       |       |       |       |       |
|                                                                                                                                | N        | Col % | N            | Row %  | N                | Row % | N                    | Col % | N            | Row %  | N                | Row % |        |       |       |       |       |       |
|                                                                                                                                | 772      |       | 444          | 58%    | 328              | 42%   | 772                  | 100%  | 444          | 58%    | 328              | 42%   |        |       |       |       |       |       |
| <b>Alcohol consumption</b>                                                                                                     |          |       |              |        |                  |       |                      |       |              |        |                  |       |        |       |       |       |       |       |
| Consumed alcoholic beverage in past 30 days                                                                                    |          |       | N            | Col %  | N                | Col % | N                    | Col % | N            | Col %  | N                | Col % |        |       |       |       |       |       |
| No                                                                                                                             | 268      | 35%   | 171          | 39%    | 97               | 30%   | 276                  | 36%   | 166          | 37%    | 110              | 34%   |        |       |       |       |       |       |
| Yes                                                                                                                            | 504      | 65%   | 273          | 61%    | 231              | 70%   | 496                  | 64%   | 278          | 63%    | 218              | 66%   |        |       |       |       |       |       |
| Higher consumption, binary indicators                                                                                          |          |       |              |        |                  |       |                      |       |              |        |                  |       |        |       |       |       |       |       |
| High alcohol consumption relative to others in cohort (defined as number of drinks per week top quintile, >=8 drinks per week) |          |       |              |        |                  |       |                      |       |              |        |                  |       |        |       |       |       |       |       |
| No                                                                                                                             | 650      | 84%   | 376          | 85%    | 274              | 84%   | 651                  | 84%   | 371          | 84%    | 280              | 85%   |        |       |       |       |       |       |
| Yes                                                                                                                            | 122      | 16%   | 68           | 15%    | 54               | 16%   | 121                  | 16%   | 73           | 16%    | 48               | 15%   |        |       |       |       |       |       |
| NIAAA, higher risk alcohol use disorder (defined as males>14 drinks/week, females>7 drinks/week)                               |          |       |              |        |                  |       |                      |       |              |        |                  |       |        |       |       |       |       |       |
| No                                                                                                                             | 697      | 90%   | 405          | 91%    | 292              | 89%   | 686                  | 89%   | 393          | 89%    | 293              | 89%   |        |       |       |       |       |       |
| Yes                                                                                                                            | 75       | 10%   | 39           | 9%     | 36               | 11%   | 86                   | 11%   | 51           | 11%    | 35               | 11%   |        |       |       |       |       |       |
| Binge drinking in past 30 days (defined as males >=5 drinks, females >=4 drinks)                                               |          |       |              |        |                  |       |                      |       |              |        |                  |       |        |       |       |       |       |       |
| Don't Know/Refused                                                                                                             | 7        | 1%    | 5            | 1%     | 2                | 1%    | 5                    | 1%    | 4            | 1%     | 1                | 0%    |        |       |       |       |       |       |
| No                                                                                                                             | 555      | 72%   | 319          | 72%    | 236              | 72%   | 543                  | 70%   | 313          | 70%    | 230              | 70%   |        |       |       |       |       |       |
| Yes                                                                                                                            | 210      | 27%   | 120          | 27%    | 90               | 27%   | 224                  | 29%   | 127          | 29%    | 97               | 30%   |        |       |       |       |       |       |
|                                                                                                                                | Median   | P25   | P75          | Median | P25              | P75   | Median               | P25   | P75          | Median | P25              | P75   | Median | P25   | P75   |       |       |       |
| Alcohol days, drinks, binge occasions (continuous)                                                                             |          |       |              |        |                  |       |                      |       |              |        |                  |       |        |       |       |       |       |       |
| # days consumed alcohol, <i>per week</i> <sup>b</sup>                                                                          | 0.75     | 0     | 2            | 0.75   | 0                | 2     | 0.75                 | 0     | 2            | 0.75   | 0                | 2     | 1      | 0     | 2     |       |       |       |
| # drinks, <i>per week</i> <sup>b</sup>                                                                                         | 1        | 0     | 4.5          | 1      | 0                | 4     | 1                    | 0     | 5            | 1      | 0                | 4.75  | 1.5    | 0     | 4     |       |       |       |
| # binge occasions, past 30 days                                                                                                | 0        | 0     | 1            | 0      | 0                | 1     | 0                    | 0     | 1            | 0      | 0                | 1     | 0      | 0     | 1     |       |       |       |
|                                                                                                                                | Median   | P25   | P75          | Median | P25              | P75   | Median               | P25   | P75          | Median | P25              | P75   | Median | P25   | P75   |       |       |       |
| <b>Alcohol outlets</b>                                                                                                         |          |       |              |        |                  |       |                      |       |              |        |                  |       |        |       |       |       |       |       |
| Off-Premise Outlets, network distance to nearest outlet                                                                        |          |       |              |        |                  |       |                      |       |              |        |                  |       |        |       |       |       |       |       |
| Miles                                                                                                                          | 0.522    | 0.342 | 0.942        | 0.464  | 0.313            | 0.686 | 0.753                | 0.387 | 1.408        | 0.548  | 0.338            | 0.962 | 0.455  | 0.297 | 0.693 | 0.795 | 0.385 | 1.523 |
| Meters                                                                                                                         | 835      | 547   | 1507         | 742    | 500              | 1098  | 1205                 | 619   | 2253         | 877    | 541              | 1539  | 729    | 475   | 1109  | 1272  | 616   | 2436  |
| Off-Premise Outlets, number in buffer                                                                                          |          |       |              |        |                  |       |                      |       |              |        |                  |       |        |       |       |       |       |       |
| 1600 meter buffer                                                                                                              | 5        | 1     | 10           | 7      | 3                | 13    | 2                    | 0     | 5            | 5      | 1                | 10    | 7      | 3     | 13    | 2     | 0.5   | 5     |
| Off-Premise Outlets, number in buffer, per 10,000 population                                                                   |          |       |              |        |                  |       |                      |       |              |        |                  |       |        |       |       |       |       |       |
| 1600 meter buffer                                                                                                              | 1.8      | 0.9   | 2.9          | 1.7    | 1.0              | 2.6   | 1.9                  | 0.0   | 3.4          | 1.7    | 1.0              | 2.8   | 1.7    | 1.1   | 2.7   | 1.8   | 0.2   | 3.3   |
| <b>Population density</b>                                                                                                      |          |       |              |        |                  |       |                      |       |              |        |                  |       |        |       |       |       |       |       |
| Population density, population in the 1.6 buffer (per 1,000)                                                                   |          |       |              |        |                  |       |                      |       |              |        |                  |       |        |       |       |       |       |       |
| 1600 meter buffer                                                                                                              | 24.9     | 9.4   | 50.3         | 45.3   | 24.4             | 62.6  | 9.4                  | 6.2   | 19.4         | 25.1   | 9.9              | 51.7  | 46.8   | 24.1  | 64.5  | 10.0  | 6.6   | 19.6  |

SD: standard deviation, P25: 25th percentile, P75: 75th percentile, Col = column, NIAAA: U.S. National Institute on Alcohol Abuse and Alcoholism

a Includes participants who did not consume alcohol in past 30 days (N = 207 or 27% of the cohort)

b Note that in main text Table 1, consumption is shown *per month* (whereas here we show consumption *per week*).

**Supplement Table 5. Cross-sectional sensitivity analysis - sample subset to drinkers.**

Adjusted<sup>a</sup> cross-sectional estimates of alcohol consumption with density of off-premise outlets and distance to outlets. N=565

| Exposure                                                              | Number of drinking DAYS per week <sup>b</sup><br>(continuous counts) |            |             |         | Number of DRINKS per week<br>(continuous counts) |            |             |         | HIGH number of drinks per week <sup>c</sup><br>(binary variable) |            |             |         | BINGE in past 30 days <sup>d</sup><br>(binary variable) |            |             |         |      |      |      |       |
|-----------------------------------------------------------------------|----------------------------------------------------------------------|------------|-------------|---------|--------------------------------------------------|------------|-------------|---------|------------------------------------------------------------------|------------|-------------|---------|---------------------------------------------------------|------------|-------------|---------|------|------|------|-------|
|                                                                       | Exp (Beta) <sup>c</sup>                                              | 95% CI low | 95% CI high | p value | Exp (Beta) <sup>c</sup>                          | 95% CI low | 95% CI high | p value | Odds Ratio b                                                     | 95% CI low | 95% CI high | p value | Odds Ratio b                                            | 95% CI low | 95% CI high | p value |      |      |      |       |
| <b>Alcohol outlet density in 1.6 km buffer, per 10,000 population</b> |                                                                      |            |             |         |                                                  |            |             |         |                                                                  |            |             |         |                                                         |            |             |         |      |      |      |       |
| Quartiles                                                             |                                                                      |            |             |         |                                                  |            |             |         |                                                                  |            |             |         |                                                         |            |             |         |      |      |      |       |
| Q1. Lowest                                                            | 0.0 - 0.99                                                           |            |             |         | Referent                                         |            |             |         | Referent                                                         |            |             |         | Referent                                                |            |             |         |      |      |      |       |
| Q2.                                                                   | 1.0 - 1.70                                                           |            |             |         | 1.04                                             | 0.86       | 1.26        | 0.697   | 1.08                                                             | 0.96       | 1.21        | 0.205   | 1.36                                                    | 0.70       | 2.65        | 0.368   | 1.09 | 0.65 | 1.82 | 0.757 |
| Q3.                                                                   | 1.71 - 2.8                                                           |            |             |         | 1.17                                             | 0.97       | 1.41        | 0.096   | 1.27                                                             | 1.14       | 1.42        | <.0001  | 2.20                                                    | 1.16       | 4.16        | 0.016   | 0.92 | 0.55 | 1.55 | 0.765 |
| Q4. Highest                                                           | 2.9 - 10.7                                                           |            |             |         | 1.26                                             | 1.06       | 1.50        | 0.008   | 1.33                                                             | 1.20       | 1.48        | <.0001  | 1.61                                                    | 0.86       | 3.02        | 0.141   | 1.15 | 0.70 | 1.90 | 0.580 |
| <b>Distance from participant to nearest off-premise outlet</b>        |                                                                      |            |             |         |                                                  |            |             |         |                                                                  |            |             |         |                                                         |            |             |         |      |      |      |       |
| Tertiles (kilometers and miles)                                       |                                                                      |            |             |         |                                                  |            |             |         |                                                                  |            |             |         |                                                         |            |             |         |      |      |      |       |
| T1. Nearest                                                           | 0.021 - 0.622 km (0.01-0.386 miles)                                  |            |             |         | Referent                                         |            |             |         | Referent                                                         |            |             |         | Referent                                                |            |             |         |      |      |      |       |
| T2.                                                                   | 0.623 - 1.26 km (0.387-0.78 miles)                                   |            |             |         | 1.04                                             | 0.89       | 1.21        | 0.643   | 0.98                                                             | 0.90       | 1.07        | 0.692   | 0.95                                                    | 0.57       | 1.61        | 0.860   | 1.13 | 0.72 | 1.77 | 0.590 |
| T3. Farthest                                                          | 1.27 - 10.16 km (0.79-6.31 miles )                                   |            |             |         | 0.84                                             | 0.69       | 1.01        | 0.069   | 0.81                                                             | 0.72       | 0.91        | 0.0003  | 0.61                                                    | 0.31       | 1.19        | 0.146   | 1.33 | 0.77 | 2.30 | 0.300 |

a Cross-sectional results follow-up, adjusted for age, sex, race/ethnicity, per capita income, educational attainment, history of chronic disease (binary), state.

When per-population was not part of the exposure measure, then the model also adjusted for population density within a 1.6 km area (operationalized into quartiles).

Within each quartile of the standardized count, the median (and p25, p75) of the unstandardized 1.6km density is as follows: Q1: median 0 outlets (0-1); Q2: median 6 outlets (2, 8); Q3: median 7 outlets (3, 13); Q4: median 11 outlets (4, 25)

b Beta coefficients derived from Poisson regression. Beta represents the difference in the logs of expected drinking days (per month) for discrete exposure category vs. referent level.

Here, exponentiated beta coefficients represents a relative value. Thus, in cross-sectional data the exp(beta) 1.35 can be interpreted

as 35% higher drinking days per month when living in the highest quartile of outlet density (0.29-1.7 per 10,000 population) relative to the lowest quartile (the referent group).

c Odds ratios derived from logistic regression. High consumption relative to others in cohort (top quintile >= 8 drinks per week)

**Supplement Table 6. Longitudinal sensitivity analysis - sample subset to drinkers.**

Multinomial regression, adjusted<sup>a</sup> within-person change in alcohol consumption (change in days, drinks, binge occasions) for an increase in off-premise alcohol outlets within a 1.6 km buffer (>0 increase in outlets). **N=521**<sup>b</sup>

| Outcome                                                      | N   | % in sample | Adjusted Odds Ratio <sup>c</sup> | 95% CI low | 95% CI high | p value |
|--------------------------------------------------------------|-----|-------------|----------------------------------|------------|-------------|---------|
| Change in number of drinking days per week                   |     |             |                                  |            |             |         |
| 0 No change                                                  | 95  | 18%         | Referent                         |            |             |         |
| 1 Increased                                                  | 206 | 40%         | 1.38                             | 0.70       | 2.73        | 0.354   |
| 2 Decreased                                                  | 220 | 42%         | 1.00                             | 0.51       | 1.95        | 0.989   |
| Change in number of drinks per week                          |     |             |                                  |            |             |         |
| 0 No change                                                  | 46  | 9%          | Referent                         |            |             |         |
| 1 Increased                                                  | 244 | 47%         | 0.79                             | 0.34       | 1.85        | 0.591   |
| 2 Decreased                                                  | 231 | 44%         | 0.48                             | 0.21       | 1.15        | 0.099   |
| Change number of binge occasions (past 30 days) <sup>d</sup> |     |             |                                  |            |             |         |
| 0 No change                                                  | 290 | 56%         | Referent                         |            |             |         |
| 1 Increased                                                  | 126 | 24%         | 0.96                             | 0.54       | 1.70        | 0.885   |
| 2 Decreased                                                  | 105 | 20%         | 0.81                             | 0.43       | 1.51        | 0.509   |

a Adjusted for age at baseline, sex, race/ethnicity, per capita income, education, history of chronic disease (binary), moved from ZIP code at followup, state at followup (Pennsylvania vs non-Pennsylvania), and population density per 1.6 km area (quartiles).

b The exposure is a binary variable: increase in outlets vs. no increase in outlets (referent category) using the measure 'count of outlets in 1.6 km buffer'. The category for 'decrease' in outlets was not included because very few participants experienced a decrease in outlets. Per population standardization was not needed for the exposure variable in longitudinal model because the exposure was within-person change in outlet exposure and population density did not change much (because participants remained in their state). Nevertheless, we included population density (quartiles) as an adjustment variable in the model.

c Odds ratios derived from multi-nomial logit regression as appropriate for 3-level outcome: alcohol consumption no change (referent category), decrease, increase. Change defined as |>0| days per week, |>0| drinks per week, |>0| binge days per month.

d Binge refers to past 30 days consumed a large volume of alcohol during a single occasion (>=5 drinks for males, >=4 drinks for females).



**Supplement Figure 2.** Adjusted cross-sectional estimates of exposure to off premise alcohol outlets (density of and distance to outlets) and number of drinks per day, stratified by gender.

There was no strong evidence that there were cross-sectional differences by gender in the association between alcohol outlets (density or proximity) and drinking days or high alcohol use or binge in past 30 days (P for interaction > 0.09 and no evidence from longitudinal analyses that there were differences by gender in the association between change in outlet and change in consumption (p for interaction > 0.18)). The exception to this was in cross-sectional analysis, the association between alcohol outlets (density or proximity) and drinks per week was stronger for males than females (P for interaction <0.0001, Supplement Figure 2). For example, males living in the highest density area (quartile 4 vs. 1) had 35% more drinks per week vs. females 24% more drinks per week (males  $\text{exp}\beta$  1.35, 95% CI: 1.18, 1.54; females  $\text{exp}\beta$  1.24, 95% CI: 1.04, 1.48). The association between living in an area farthest from an alcohol outlet and lower number of drinking days was only apparent for males (tertile 3 vs. 1 males  $\text{exp}\beta$  0.62, 95% CI: 0.53, 0.72), whereas for females the association was positive (which was the inverse of our hypothesis,  $\text{exp}\beta$  1.25, 95% CI 1.03, 1.51).

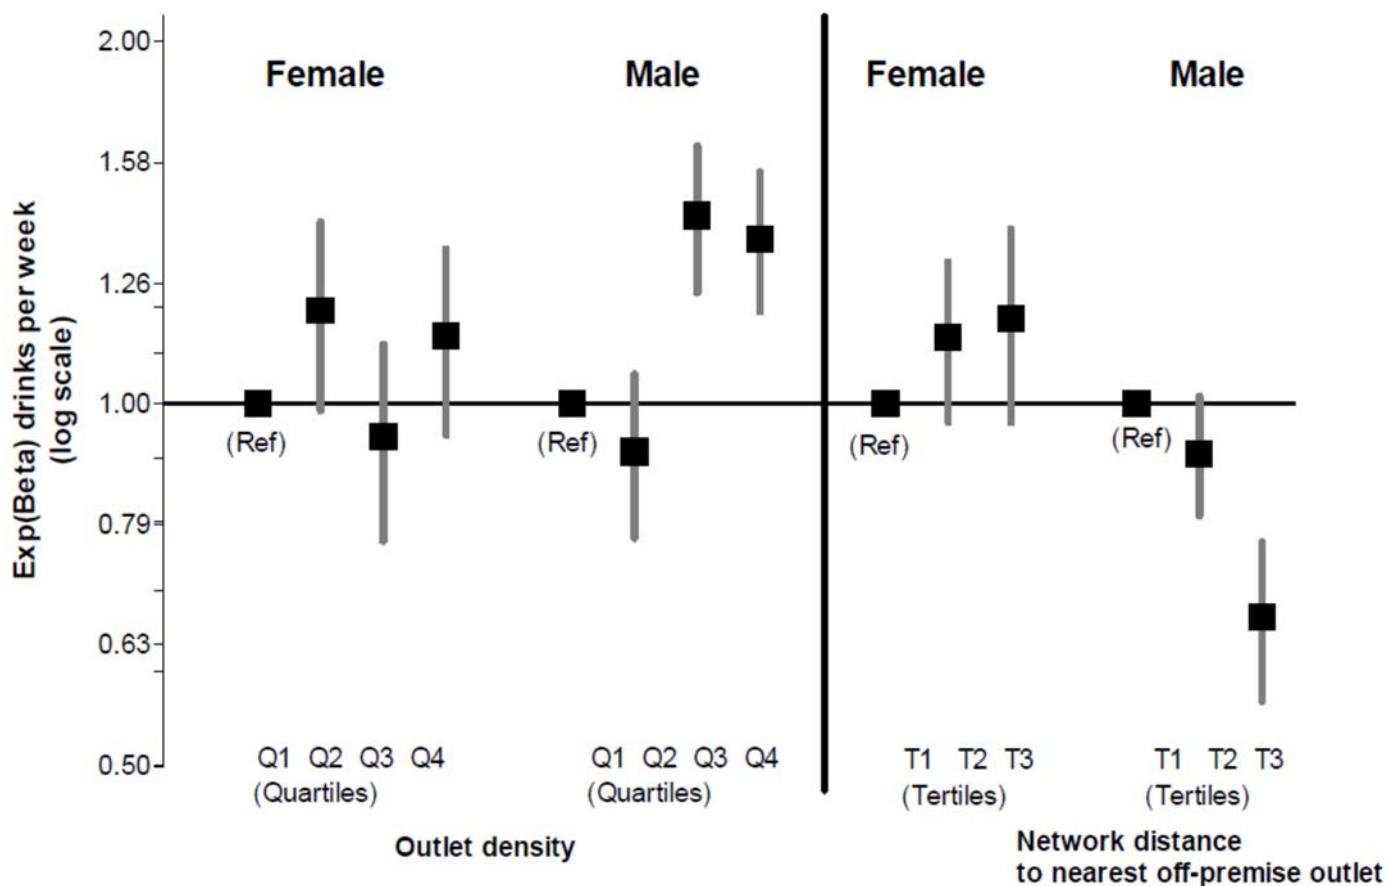

SD: standard deviation, P25: 25th percentile, P75: 75th percentile, Col = column, NIAAA: U.S. National Institute on Alcohol Abuse and Alcoholism

a Includes participants who did not consume alcohol in past 30 days (N = 207 or 27% of the cohort)

b Note that in main text Table 1, consumption is shown per month (whereas here we show consumption per week).
